# Supplementary material for: Regulation of antilipopolysaccharide factors, ALFPm3 and ALFPm6, in Penaeus monodon
Source: PubMed Central journal article supplement (PMC5627258; doi:10.1038/s41598-017-12137-5), 2017-10-04
Supplement: 41598_2017_12137_MOESM1_ESM.pdf [file 41598_2017_12137_MOESM1_ESM.pdf]

# **Regulation of antilipopolysaccharide factors, *ALFPm3* and *ALFPm6*, in *Penaeus monodon***

**Pitchayanan Kamsaeng<sup>1</sup>, Anchalee Tassanakajon<sup>1</sup>, Kunlaya Somboonwiwat<sup>1,\*</sup>**

<sup>1</sup>Center of Excellence for Molecular Biology and Genomics of Shrimp, Department of Biochemistry,  
Faculty of Science, Chulalongkorn University, Phayathai Rd., Bangkok 10330, Thailand

\* kunlaya.s@chula.ac.th

## Supplementary Table S1. Summary of primers used to this study

| Primer name                                             | Sequence (5'→3')                      |
|---------------------------------------------------------|---------------------------------------|
| <b>For genome walking</b>                               |                                       |
| GSP1_ALFPm3_primary                                     | CTTGCACTCGTGGCCGAGAAGTTCAGTT          |
| GSP2_ALFPm3_nested                                      | AGCACCAGGCTTACCAGCACGGACACA           |
| GSP1_ALFPm6_primary                                     | AGTTTGTTCGCAATGGCTGGCACCAAT           |
| GSP2_ALFPm6_nested                                      | CACCACCACCACGAGGATCATGCTGAA           |
| <b>For luciferase construction</b>                      |                                       |
| ALFPm3promo+324BglII_R                                  | AGGCGCAGATCTCTTCTGCAAGGGAAATAAAGATAAC |
| ALFPm3promo-1478NheI_F                                  | ATGAGCTAGCGCTGGTCCTGTGGTAAG           |
| ALFPm3promo-814NheI_F                                   | AGTAGCTAGCGAAGCAGAGCCTCGCTAT          |
| ALFPm3promo-719NheI_F                                   | ATCTGCTAGCTGAGGAAGAATGTGCGAGTG        |
| ALFPm3promo-265NheI_F                                   | GCCTGCTAGCGAAATACGCGTTGCTGT           |
| ALFPm3promo-71NheI_F                                    | TACGGCTAGCATAGGCTCCTGGCAACT           |
| ALFPm6promo+85BglII_R                                   | ACTGAGATCTGATGGACGTGAAGTGAAG          |
| ALFPm6promo-419NheI_F                                   | TTACGCTAGCCCCGGGCTGGTAAATG            |
| ALFPm6promo-282NheI_F                                   | ATCGGCTAGCGGCTGGTATTCCCAAGTCT         |
| ALFPm6promo-162NheI_F                                   | AGCGGCTAGCACATGTATGAATGCCGAAAACG      |
| ALFPm6promo-80NheI_F                                    | CAGCGCTAGCACATTTATGCACCCATCTCC        |
| <b>For deletion assay and site-directed mutagenesis</b> |                                       |
| del(-693/-358)/p(-1478/+324)F                           | AGAGAGGGGGGGGAGAGG                    |
| del(-693/-358)/p(-1478/+324)R                           | CTTTCACCTCGCACATTCTTCCTCACTC          |
| p(-814/+324)muNF-kB_F                                   | CGTTGCTGTTACTATAGTTTCCACGTCG          |
| p(-814/+324)muNF-kB_R                                   | CGTATTTCCAGCTGAGAAAGATACTGCC          |
| p(-282/+85)muICSBP_F                                    | ACATGTATGAATGCCGCACACTCCAAGTGGCTG     |
| p(-282/+85)muICSBP_R                                    | ATATCTATAACATAATGGACTTTGG             |
| p(-282/+85)muC/EBPβ_F                                   | AATGTATAAAGTAACATTTATGCACC            |
| p(-282/+85)muC/EBPβ_R                                   | ATTCACACATTATATGTTATTCTCA             |
| <b>For dsRNA synthesis</b>                              |                                       |

### **PmMyD88 dsRNA**

Sense strand template

T7-MyD88-F TAATACGACTCACTATAGGG-

CCTCAGCAAAGGTCTTGAAC

MyD88-R CAGTCCACCAATTAGGTCTC

Anti-sense strand template

MyD88-F CCTCAGCAAAGGTCTTGAAC

T7-MyD88-R TAATACGACTCACTATAGGG-

CAGTCCACCAATTAGGTCTC

### **PmRelish dsRNA**

Sense strand template

T7-Relish-F TAATACGACTCACTATAGGG-

CTCGTGGTCAGGAAGACTCAAT

Relish-R GACTGGAGATGGAGACTGAATG

Anti-sense strand template

Relish-F CTCGTGGTCAGGAAGACTCAAT

T7-Relish-R TAATACGACTCACTATAGGG-

GACTGGAGATGGAGACTGAATG

### **GFP dsRNA**

Sense strand template

T7-GFP-F TAATACGACTCACTATAGGG-

ATGGTGAGCAAGGGCGAGGA

GFP-R TTACTTGTACAGCTCGTCCA

Anti-sense strand template

GFP-F ATGGTGAGCAAGGGCGAGGA

T7-GFP-R TAATACGACTCACTATAGGG-

TTACTTGTACAGCTCGTCCA

### **For RT-PCR**

EF1 $\alpha$  -F GGTGCTGGACAAGCTGAAGGC

EF1 $\alpha$  -R CGTTCCGGTGATCATGTTCTTGATG

PmMyD88-RT\_F GTGCACCAGAGTCATTGTAG

|               |                          |
|---------------|--------------------------|
| PmMyD88-RT_R  | GGGAGTGGCAGAACTTATC      |
| PmRelish-RT_F | TCTCCAGGTGAGCACTCAGTTG   |
| PmRelish-RT_R | GCTGTAGCTGTTGCTGTTGTTGAG |

**For quantitative realtime RT-PCR**

|              |                      |
|--------------|----------------------|
| qRT-ALFPm3_F | CCCACAGTGCCAGGCTCAA  |
| qRT-ALFPm3_R | TGCTGGCTTCTCCTCTGATG |
| qRT-ALFPm6_F | AGTCAGCGTTTAGAGAGGTT |
| qRT-ALFPm6_R | GCTCGAACTCTCCACTCTC  |
